# Supplementary material for: Moderate Fluid Shear Stress Regulates Heme Oxygenase-1 Expression to Promote Autophagy and ECM Homeostasis in the Nucleus Pulposus Cells
Source: PubMed Central journal article supplement (PMC7064043; doi:10.3389/fcell.2020.00127), 2020-03-03
Supplement: Image_1.pdf [file Image_1.pdf]

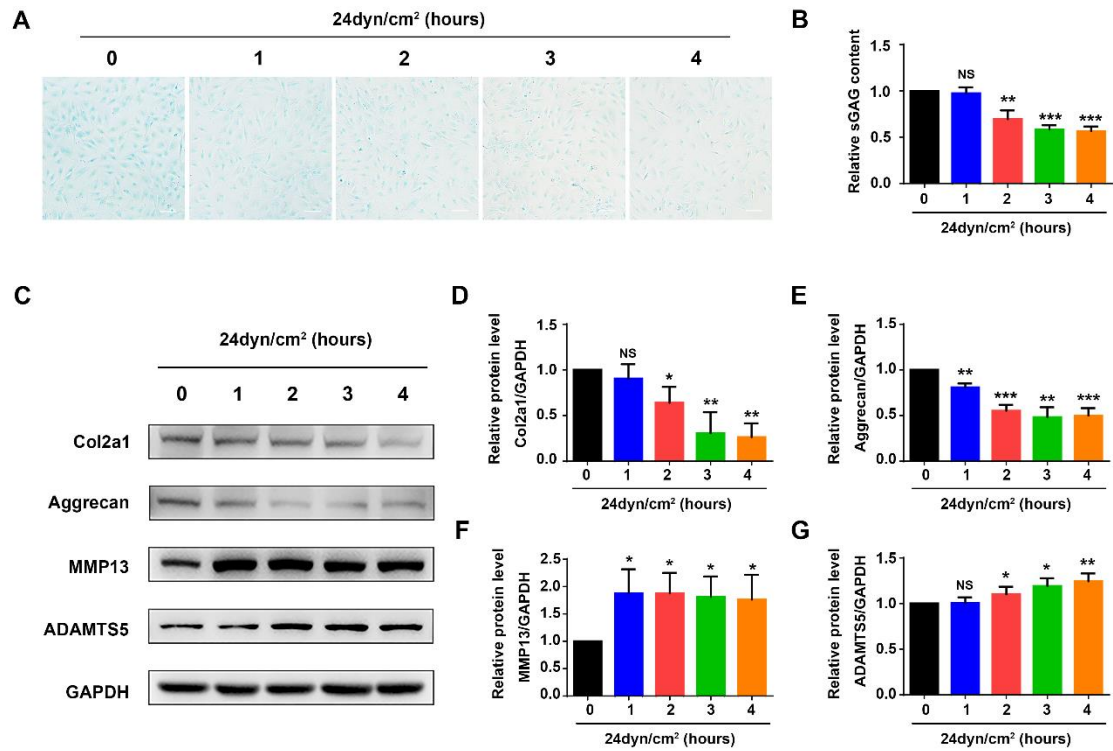

**Supplementary Figure 1** FSS of 24 dyne/cm<sup>2</sup> regulated ECM metabolism. **a** Alcian blue staining for NP cells stimulated with FSS for indicated times (0, 1, 2, 3 and 4 hours). **b** Relative sGAG content of NP cells detected by Blyscan Sulfated Glycosaminoglycan Assay. **c** The typical western blot bands of Col2a1, aggrecan, MMP13 and ADAMTS5. **d-g** Summary data showing protein levels of Col2a1, aggrecan, MMP13 and ADAMTS5. NS means no statistical significant difference. The data are expressed as mean  $\pm$  SD from three independent experiments. (\* $P < 0.05$ , \*\* $P < 0.01$  and \*\*\* $P < 0.001$  vs. the group of 0 hour group)
